# Supplementary material
Source: Springer Nature journal article supplement (https://www.springermedizin.de/resource/supplementary/12889_2011_3855_MOESM3_ESM.pdf/9493284)

# DPP

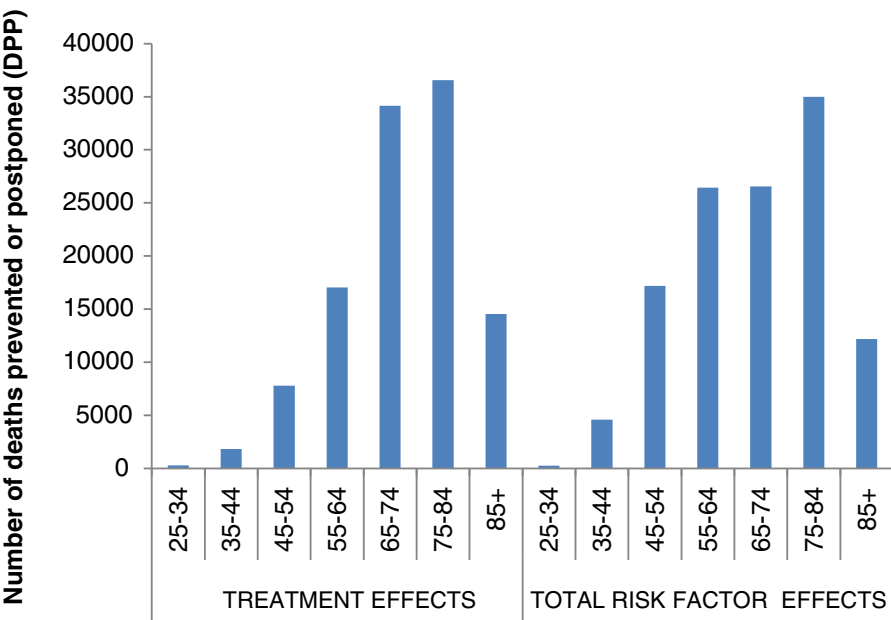

# LYG

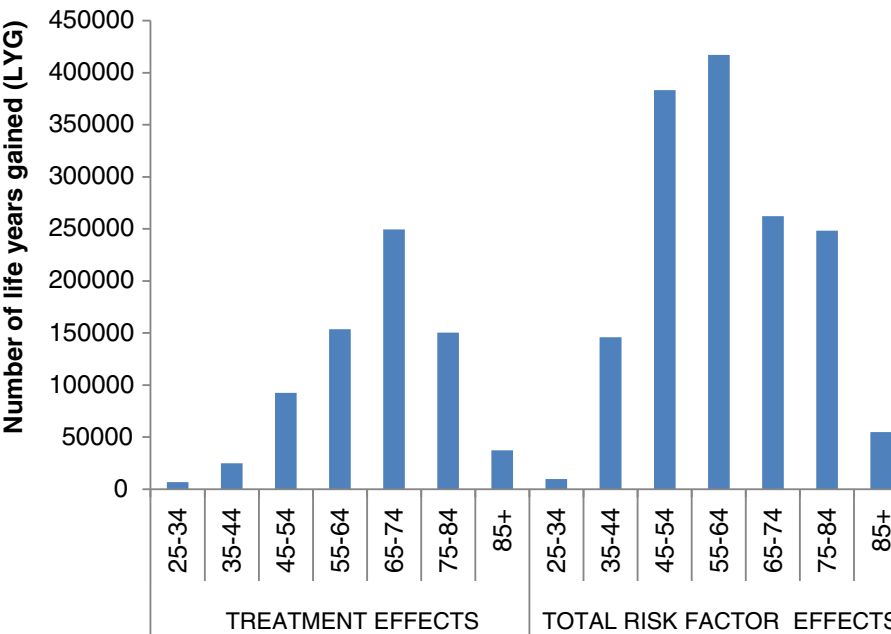

Supplement: MOESM3 [file 9493284]
